1 **The K18-hACE2 Transgenic Mouse Model Recapitulates Non-Severe and Severe COVID-**  
2 **19 in Response to Infectious Dose of SARS-CoV-2 Virus**

3 Wenjuan Dong<sup>a,b,#</sup>, Heather Mead<sup>c,#</sup>, Sierra Jaramillo<sup>c</sup>, Tasha Barr<sup>a,b</sup>, Daniel S. Kollath<sup>c</sup>, Vanessa  
4 K. Coyne<sup>c</sup>, Nathan E. Stone<sup>c</sup>, Ashley Jones<sup>c</sup>, Jianying Zhang<sup>d</sup>, Aimin Li<sup>e</sup>, Li-Shu Wang<sup>f</sup>, Martha  
5 Milanes-Yearsley<sup>g</sup>, Paul S Keim<sup>c</sup>, Bridget Marie Barker<sup>c</sup>, Michael Caligiuri<sup>a,b,h,\*</sup>, and Jianhua  
6 Yu<sup>a,b,h,\*</sup>

7 <sup>a</sup>Department of Hematology & Hematopoietic Cell Transplantation, City of Hope National  
8 Medical Center, Duarte, CA 91010

9 <sup>b</sup>Hematologic Malignancies Research Institute, City of Hope National Medical Center, Duarte,  
10 CA 91010

11 <sup>c</sup>Pathogen and Microbiome Institute, Northern Arizona University, Flagstaff, AZ 86011

12 <sup>d</sup>Department of Computational and Quantitative Medicine, City of Hope National Medical  
13 Center, Duarte, CA 91010

14 <sup>e</sup>Pathology Shared Resource Core, Beckman Research Institute, City of Hope National Medical  
15 Center, Los Angeles, CA 91010, USA

16 <sup>f</sup>Division of Hematology and Oncology, Department of Medicine, Medical College of  
17 Wisconsin, Milwaukee, WI 53226, USA

18 <sup>g</sup>Department of Pathology, The Ohio State University, Columbus, OH 43210

19 <sup>h</sup>City of Hope Comprehensive Cancer Center, Duarte, CA 91010

20 # Wenjuan Dong and Heather Mead contributed equally to this work.

21 **Running Head:** K18-hACE2 recapitulates COVID-19 in mice

22 Abstract Word Count: 240

23 Word Count: 5099

24 \*Correspondence should be addressed to Jianhua Yu, PhD, [jiayu@coh.org](mailto:jiayu@coh.org); Michael A. Caligiuri,  
25 MD, [mcaligiuri@coh.org](mailto:mcaligiuri@coh.org)

26

27 **Abstract**

28 A comprehensive analysis and characterization of a SARS-CoV-2 infection model that mimics  
29 non-severe and severe COVID-19 in humans is warranted for understating the virus and  
30 developing preventive and therapeutic agents. Here, we characterized the K18-hACE2 mouse  
31 model expressing human (h)ACE2 in mice, controlled by the human keratin 18 (K18) promoter,  
32 in epithelia, including airway epithelial cells where SARS-CoV-2 infections typically start. We  
33 found that intranasal inoculation with higher viral doses ( $2 \times 10^3$  and  $2 \times 10^4$  PFU) of SARS-CoV-2  
34 caused lethality of all mice and severe damage of various organs, including lungs, liver, and  
35 kidney, while lower doses ( $2 \times 10^1$  and  $2 \times 10^2$  PFU) led to less severe tissue damage and some  
36 mice recovered from the infection. In this humanized hACE2 mouse model, SARS-CoV-2  
37 infection damaged multiple tissues, with a dose-dependent effect in most tissues. Similar damage  
38 was observed in biopsy samples from COVID-19 patients. Finally, the mice that recovered after  
39 infection with a low dose of virus also survived rechallenge with a high dose of virus. Compared  
40 to other existing models, the K18-hACE2 model seems to be the most sensitive COVID-19  
41 model reported to date. Our work expands the information available about this model to include  
42 analysis of multiple infectious doses and various tissues with comparison to human biopsy  
43 samples from COVID-19 patients. In conclusion, the K18-hACE2 mouse model recapitulates  
44 both severe and non-severe COVID-19 in humans and can provide insight into disease  
45 progression and the efficacy of therapeutics for preventing or treating COVID-19.

46

## 47 **Importance**

48 The pandemic of COVID-19 has reached 112,589,814 cases and caused 2,493,795 deaths  
49 worldwide as of February 23, 2021, has raised an urgent need for development of novel drugs  
50 and therapeutics to prevent the spread and pathogenesis of SARS-CoV-2. To achieve this goal,  
51 an animal model that recapitulates the features of human COVID-19 disease progress and  
52 pathogenesis is greatly needed. In this study, we have comprehensively characterized a mouse  
53 model of SARS-CoV-2 infection using K18-hACE2 transgenic mice. We infected the mice with  
54 low and high doses of SARS-CoV-2 virus to study the pathogenesis and survival in response to  
55 different infection patterns. Moreover, we compared the pathogenesis of the K18-hACE2  
56 transgenic mice with that of the COVID-19 patients to show that this model could be a useful  
57 tool for the development of anti-viral drugs and therapeutics.

58

59

## 60 **Introduction**

61 The global pandemic of coronavirus disease 2019 (COVID-19) caused by the extremely  
62 contagious RNA coronavirus SARS-CoV-2 has led to 112,589,814 cases and 2,493,795 deaths  
63 worldwide as of February 23, 2021 (1). The median time to development of symptoms is 5.1  
64 days after exposure to SARS-CoV-2 (2). The median time from onset to clinical recovery for  
65 mild cases is approximately 2 weeks, with 3-6 weeks for patients with severe or advanced  
66 disease (3). The main symptoms, such as fever or chills, cough, shortness of breath, difficulty  
67 breathing, and sore throat normally ease after recovery; however, 3-17% patients, especially the  
68 elderly and individuals with cancer and diabetes, develop rapid viral replication and severe lung  
69 damage, resulting in severe disease with greatly increased risk of death (4). Many groups are  
70 trying to understand this rapid disease progression and studies suggest that it may involve an  
71 impaired immune response (5-7). A mouse model that appropriately mirrors progression of the  
72 human disease should help the development of vaccines or therapeutics for COVID-19 and could  
73 be used as a conceptual basis for rapid response to future viral pandemics.

74

75 During infection with SARS-CoV-2, the coronavirus spike (S) glycoprotein promotes SARS-  
76 CoV-2 entry into host cells via the host receptor angiotensin converting enzyme 2 (ACE2)(8).  
77 K18-hACE2 transgenic mice, which were originally developed to study the infection of SARS-  
78 CoV, express human ACE2, the receptor used by SARS-CoV-2 to gain entry into cells (9). The  
79 human keratin 18 (K18) promoter is responsible for directing expression to airway epithelial  
80 cells, where respiratory infections usually begin. Recent research reported this SARS-CoV-2  
81 hACE2 mouse infection model develops severe interstitial pneumonia with high viral loads into  
82 the lungs and immune cell infiltration into the alveoli (10-13). A comprehensive analysis and  
83 characterization of this model will be useful for studying the mechanisms of pathogenesis by  
84 SARS-CoV-2 and developing preventive, therapeutic, and vaccinal agents.

85  
86 In the current study, we evaluate K18-hACE2 transgenic mice in response to multiple infectious  
87 doses, using multiple tissues, to gain a complete understanding of the response to the infectious  
88 dose. We also evaluated the response of K18-hACE2 mice to high-dose re-infection after  
89 recovery from low-dose infection.

## 91 **Results**

### 93 **The K18-hACE2 model is a lethal infection model for SARS-CoV-2 infection**

94 To understand the effects of SARS-CoV-2 viral dosage on pathogenesis and survival, we  
95 established an infection model using the K18-hACE2 transgenic mice, in which human  
96 angiotensin-converting enzyme 2 (hACE2) expression is driven by the epithelial cell-specific  
97 promoter K18 in C57BL/6 mice(9). The mice were infected with SARS-CoV-2 at  $2 \times 10^1$  PFU  
98 (low dose),  $2 \times 10^2$  PFU (low dose),  $2 \times 10^3$  PFU (high dose),  $2 \times 10^4$  PFU (high dose) or PBS  
99 vehicle control via intranasal inoculation. Blood was collected at day 3 post infection (p.i.) then  
100 the mice were euthanized, and viral loads and pathology were examined at day 6 p.i. (Fig. 1A).  
101 We found that mouse body weight decreased in mice infected with  $2 \times 10^3$  PFU and  $2 \times 10^4$  PFU

102 by day 4 p.i, whereas mice infected with  $2 \times 10^1$  PFU and  $2 \times 10^2$  PFU showed a less dramatic  
103 body weight decrease; a body weight decrease of 20% occurred at days 5–6 in the higher-dose  
104 groups, but took until day 10–11 for 80% of the mice in the low-dose groups (**Fig. 1B**). 30% of  
105 the mice from the lower-dose groups even started to gain weight again at day 4 (for  $2 \times 10^1$ ) and  
106 day 8 (for  $2 \times 10^2$ ) (**Fig. 1B**), indicating a recovery from the viral infection in low-dose groups.  
107 Consistent with body weight data, 90% of the mice infected with  $2 \times 10^3$  PFU or  $2 \times 10^4$  PFU died  
108 at approximately at day 7, whereas 50% of the mice infected with  $2 \times 10^1$  PFU or  $2 \times 10^2$  PFU  
109 died approximately at day 10 (**Fig. 1C**). Three mice infected with  $2 \times 10^1$  PFU or  $2 \times 10^2$  PFU,  
110 and none infected with  $2 \times 10^3$  PFU or  $2 \times 10^4$  PFU, recovered and survived until the end of  
111 follow-up on day 20 p.i. (**Fig.1C**).

112

### 113 **Expression distribution of viral genes in the tissues of K18-hACE2 mice infected with high** 114 **or low doses of SARS-CoV-2**

115 To further investigate the viral infection pattern, we used reverse transcriptase (RT)-PCR to  
116 measure viral spike protein RNA levels in the brain, trachea, lung, liver, spleen, small intestine,  
117 stomach, large intestine, kidney, and testis. The mean viral loads in all three higher dose groups  
118 were over PBS and  $1 \times 10^2$ , except for  $2 \times 10^1$  PFU in the spleen, and no virus was detected in  
119 uninfected controls (**Fig. 2A**). We observed three types of dose-response relationships. In trachea,  
120 lung, stomach, and kidney, there was a stepwise dose-response relationship. In heart, liver, spleen,  
121 and small intestine, the observed a plateau, with the 3 higher dose groups having similar viral  
122 loads. In brain, large intestine, and testis, mice infected with  $2 \times 10^1$  PFU or  $2 \times 10^2$  PFU had  
123 similar viral loads and mice infected with  $2 \times 10^3$  PFU or  $2 \times 10^4$  PFU had much higher viral  
124 loads. This indicates that there are tissue-specific factors modulating the effect of dose on viral

125 copy number. The viral RNA levels were high in the lungs of animals in all dose groups (**Fig.**  
126 **2A**), consistent with the notion the lung is an important site of infection, especially at lower viral  
127 doses. The viral RNA levels were also very high in brain for mice infected with  $2 \times 10^3$  PFU or  $2$   
128  $\times 10^4$  PFU. We used immunohistochemistry (IHC) to measure expression of SARS-CoV-2  
129 nucleocapsid protein (NP) in formalin-fixed, paraffin-embedded (FFPE) tissues, which  
130 confirmed the infection pattern in the lungs and brains of the K18-hACE2 mice infected with a  
131 series of increasing viral doses, demonstrating that viral spread in tissues was also dose-  
132 dependent (**Fig. 2B**).

133  
134 To evaluate the lung cell types that are susceptible to SARS-CoV-2 infection, we performed IHC  
135 on samples from mice infected with  $2 \times 10^4$  PFU. We double stained lung sections for viral NP  
136 and CCL10, which is the marker of club (clara) cells, or SPC, the marker of alveolar type 2 cells,  
137 respectively. We found that only few club cells or alveolar type 2 cells co-localized with NP,  
138 suggesting they are susceptible to SARS-CoV-2 infection (**Fig. 3A**). Macrophages are a major  
139 immune cell population in lung, where they act as a first-line defense against invading pathogens.  
140 We therefore used the CD68 as a macrophage marker to examine if SARS-CoV-2 could infect  
141 tissue resident macrophages in lung. We noticed that that CD68 positive cells increased  
142 dramatically in response to SARS-CoV-2 infection, although very few macrophages stained  
143 positive for NP, suggesting that it could be possible for SARS-CoV-2 to suppress immune  
144 response via infection of lung macrophages (**Fig. 3A**). Consistent with the finding in the K18-  
145 hACE2 mouse model, in biopsy lung samples from COVID-19 patients, few viral spike protein  
146 is colocalized with alveolar type 2 cells and CD68-positive cells (**Fig. 3B**). These results are in  
147 line with another SARS-CoV-2 infection mouse model that uses CRISPR/Cas9 knockin of

148 *hACE2* into Exon 2 of the *mAce2* gene, as well as COVID-19 patient samples, which show  
149 SARS-CoV-2 in macrophages of pulmonary alveolus (12, 14). Given the high levels of SARS-  
150 CoV-2 in brain, we examined whether neurons are infected with SARS-CoV-2. We found strong  
151 overlap between staining for the neuronal marker Neu and staining for NP (**Fig. 3A**). Human  
152 lung alveolar type II cells were injured significantly by COV19 virus infection. This was  
153 identified by the reduction of the number and stain intensity of SPC positive cells (yellow) in  
154 infected lung compared to no-infected lung. In COVID-19 lung sample #1, which has highest  
155 virus amount (teal), the SPC positive cells are almost completely lost, whereas in the other lungs,  
156 SPC positive cells are low and fallen off from epithelium into alveolar lumen; meanwhile,  
157 Consistent with findings in mouse COV19 model, in human lung, very few CD68 positive  
158 macrophages (yellow) are also positive for Spike (teal). Our results indicated that the K18-  
159 *hACE2* mice could be a suitable model for mimicking the infections of the COVID-19 patients.

160

#### 161 **Pathology of tissues of K18-*hACE2* mice infected with SARS-CoV-2**

162 To assess disease severity, we used H&E staining to assess pathology in multiple FFPE tissues  
163 from K18-*hACE2* mice infected with a series of increasing doses of SARS-CoV-2. As expected,  
164 lung tissues showed the most severe damage. Mice in the low-dose groups showed an average of  
165 30–60% more alveolar congestion and consolidation compared to uninfected mice (**Fig. 4A**).  
166 Some lung tissue showed alveolar hemorrhage as well as lymphocytic pneumonitis with alveolar  
167 thickening and peripheral parenchymal collapse. Lung damage in the high-dose groups were  
168 even more extensive, consisting of ~20% alveolar collapse with ruptured septa, as well as  
169 thickened alveolar septa and intra-alveolar. Parenchymal consolidation was evident in 50% of the  
170 tissue, along with interstitial inflammation and pneumonitis (**Fig. 4A**). Similarly, trachea tissues

171 showed mild epithelial damage in the lower-dose groups and more severe epithelial damage in  
172 the higher-dose groups. Consistent with the brain showing high viral gene expression for the  
173 higher-doses groups (**Fig. 2A**), brain tissues showed mild congestion in some mice from the low-  
174 dose groups, with more extensive congestion in the high-dose groups. In liver tissue, the low-  
175 dose groups showed several foci of spotty and patchy necrosis (focal perivenular), Kupffer cell  
176 hyperplasia, and focal portal inflammation; the high-dose groups also showed Kupffer cell  
177 hyperplasia along with congestion, reactive change, apoptotic hepatocytes, and focal lobular  
178 inflammation (**Fig. 4A**). In spleen, the low dose group showed red pulp congestion while the  
179 high dose group also showed lymphoid hyperplasia and mild extramedullary hematopoiesis. The  
180 stomach and small and large intestines in the low-dose groups appeared normal but the stomach  
181 showed reactive changes, diffuse epithelial sloughing and chronic inflammation along the  
182 myenteric plexus, while the small and large intestine showed myenteric plexus inflammation.  
183 The testis in the low dose group also appeared normal but showed focal tubular damage and  
184 congestion in the high dose group. In kidney, both the low dose and high dose group showed  
185 cortical congestion, tubular damage and focal tubular collapse. Meanwhile, both low dose and  
186 high dose group showed ischemic change and disarray in heart (**Fig. 4A**). These findings indicate  
187 that SARS-CoV-2 infection damages multiple tissues, with a dose-dependent effect in most  
188 tissues.

189

190 To compare the pathology in the mouse model to COVID-19 patients, we also examined the  
191 pathology in autopsy samples of COVID-19 patients. We identified congestion and inflammation  
192 in multiple organs, as well as the epithelial damage and necrosis, which was consistent with our  
193 findings in the SARS-CoV-2-infected K18-hACE2 mouse model (**Fig. 4B**).



194

### 195 **Expression of hACE2 in K18-hACE2 mice and human tissues**

196 To better understand the infection pattern and virus distribution in this mouse model, we  
197 measured hACE2 RNA expression levels in various tissues of hACE2 mice by RT-PCR. We  
198 found that, compared to the expression of hACE2 in lung tissue, there was also high expression  
199 in brain, trachea, heart, stomach, small intestine, large intestine, kidney, and testis; whereas there  
200 was lower expression in the liver and spleen (**Fig. 5A**). We also confirmed the hACE2 expression  
201 in brain, trachea, lung and kidney of the k18-hACE2 mice at the protein level by IHC (**Fig. 5B**).  
202 The expression of hACE2 in these three tissues in humans is consistent with the finding that they  
203 had the highest viral load, further confirming the K18-hACE2 mouse is a good model for  
204 studying in vivo SARS-CoV-2 infection. We also examined hACE2 expression in a human tissue  
205 array. We found that hACE2 is not only highly expressed in lung but also in stomach, small and  
206 large intestine, kidney and testis. However, the expression of ACE2 in human brain was not as  
207 high as in the brain of K18-hACE2 mice; this could be due to the insertion of the K18 promotor,  
208 which confers higher expression of hACE2 in the mouse model (**Fig. 5C**). This finding is  
209 consistent with another transgene driven by a human K18 regulatory element in mice(15).

210

### 211 **Protective role of serum from previously infected mice and the mice with previous low-dose** 212 **of virus infection against rechallenge with high-dose of virus infection in K18-hACE2 mice**

213

214 To evaluate if the serum from infected mice could protect the mice from viral infection, we  
215 injected virus-naïve mice with serum from mice infected with  $2 \times 10^4$  PFU group of mice and  
216 then infected the virus-naïve mice with SARS-COV2 at  $2 \times 10^4$  PFU/mouse. The body weights

217 of treated vs. control mice were continuously monitored. We found that the mice treated with  
218 serum from infected mice showed a delayed and slower body weight drop compared to the  
219 untreated group (**Fig. 6A**), suggesting the serum from infected mice could have a protective  
220 effect on newly infected mice. Serum from infected mice did not significantly protect but show  
221 but show a trend against death after virus rechallenge, which might be due to a little amount of  
222 serum that we can collected to have enough sample size (**Fig. 6B**).

223

224 In addition, we rechallenged the mice that survived  $2 \times 10^1$  or  $2 \times 10^2$  PFU infection with  $2 \times 10^4$   
225 PFU virus when they recovered to the initial body weight. We found that all mice survived the  
226 high-dose virus re-challenge and did not show substantial body weight drop, suggesting that  
227 recovery from low-dose infection conferred anti-viral activity that protected against rechallenge  
228 with high dose virus (**Fig. 6B**).

229

## 230 **Discussion**

231 The recent outbreak of SARS-CoV-2 that has claimed the lives of nearly 2,500,000 people has  
232 led to an urgent need for a mouse infection model that accurately mirrors inoculation,  
233 development and progression of the human disease termed COVID-19. The K18-hACE2 model  
234 was developed to study coronavirus infection (9). In the current study, we performed a  
235 comprehensive analysis of viral load and tissue pathology based on a range of inoculation doses  
236 and compared the results to observations in biopsy samples from COVID-19 patients. We found  
237 a dose-response relationship between infectious dose and loss of body weight, viral titer, tissue  
238 pathology and mortality. Notably, there was not a uniform relationship between infectious dose  
239 and viral titer, with some tissues accumulating virus at lower doses and others accumulating

240 virus at higher doses. We evaluated hACE2 levels in the K18-ACE2 mice and found similarity to  
241 ACE2 levels in humans. We also showed that challenge with a low dose of SARS-CoV-2  
242 protected against the lethality of rechallenge with a higher dose. Overall, our results indicate that  
243 low dose infection in the K18-hACE2 model mimics non-severe COVID-19, while infection  
244 with higher doses mimics severe COVID-19.

245

246 Due to the unprecedented impact of the COVID-19 pandemic, many models of human COVID-  
247 19 are under investigation. In addition to the K18-hACE2 model, other mouse models have been  
248 described. Hassan *et al.* used replication-defective adenoviruses encoding human ACE2-  
249 transduced mice to infect BALB/c mice, followed by SARS-CoV-2 infection, to model COVID-  
250 19 (13). Following infection by  $10^5$  focus-forming units (FFU) of SARS-CoV-2, the body weight  
251 of mice was maintained but did not drop, therefore it seems that the model is not a lethal model.  
252 Using CRISPR/Cas9 technology to knock-in hACE2, Sun *et al.* established a model (12). In  
253 response to  $4 \times 10^5$  PFU of SARS-CoV-2, the animals experienced robust viral replication in  
254 multiple tissues and interstitial pneumonia, but no obvious clinical symptoms or mortality; only  
255 10% of aged mice lost their weight at day 3 p.i. and recovered. With the low incidence rate and  
256 very mild symptoms, this model is not ideal to recapitulate human COVID-19. This might be due  
257 to the nature of the knock-in with only one copy of hACE2 systemically existing in mice. Qin  
258 and colleagues developed a hACE2 transgenic mouse model with a mouse ACE2 promoter for  
259 SARS and used the model to study SARS-CoV-2 infection (11, 16). Infected by  $10^5$  TCID<sub>50</sub> of  
260 SARS-CoV-2, the mouse body weights dropped at day 1 and continued until day 5, and then  
261 almost completely recovered on day 14 without lethality, suggesting that this model at least does  
262 not mimic severe COVID-19 patients. This might be due to lower promoter activity or gene

263 expression of murine (m)ACE2 compared to the K18 promoter (16). Ostrowski *et al.* developed  
264 transgenic mice using the promoter of the human FOXJ1, a transcription factor required for  
265 differentiation of ciliated epithelial cells in the airway, to drive hACE2 expression (17). Jiang  
266 and colleagues used this model to study SARS-CoV-2 (10). Infected with  $3 \times 10^4$  PFU virus,  
267 among 10 mice, 2 had no infection, 4 had no drop in body weight, and 4 had body weight drops  
268 with 3 deaths and 1 recovery (10). In contrast, for the K18-hACE2 model that we characterized  
269 here, with the dose of  $2 \times 10^3$  PFU, which is lower than the doses used in all above mouse models,  
270 all mice succumbed to infection with body weight drops and mortality of 100% by day 8. With  
271 lower dose infection such as  $2 \times 10^1$  and  $2 \times 10^2$  PFU, 30% of the mice recovered. Collectively,  
272 these suggest that the K18-hACE2 model is the most sensitive model for COVID-19, with ability  
273 to recapitulate aspects of human disease from both non-severe and severe COVID-19 patients.  
274 Our results are supported by those from other groups (18-22). This might be due to unique  
275 aspects of the K18-hACE2 model: 1) hACE2 is used, where in contrast other models including  
276 golden hamster, ferret, cat, Chinese tree shrew and even mouse models with an endogenous  
277 ACE2 promoter recapitulate human expression levels (23). 2) Multiple copies of hACE2 are  
278 placed in the murine genome, where as one copy of hACE2 may not be ideal, evidenced by the  
279 knock-in study by Sun *et al* (12); and 3) human K18 is likely stronger than the promoters in other  
280 models, such as the human FOXJ1 in the study by Jiang *et al.* (10)

281

282 The pathological damage in lung and brain in the K18-hACE2 mouse infection model are similar  
283 to the clinical symptoms of COVID-19 patients, suggesting this mouse model can recapitulate  
284 SARS-CoV-2 infection in humans. However, the K18-hACE2 mouse model was originally  
285 generated by inserting hACE2 in the mouse genome under the human K18 promoter, which may

286 not result in the exact distribution of ACE2 expression as in humans. In fact, we observed high  
287 expression levels of hACE2 in mouse brains, correlating with a higher virus titer in the brain  
288 compared to most other organs or tissues; however, in biopsy samples of humans, the hACE2  
289 expression is very low. Nonetheless, brain infections with COVID-19 and deaths of patients  
290 from brain-specific COVID infection have been frequently reported (24-26). Interestingly, our  
291 study showed that SARS-CoV-2 can infect neurons in an animal model, which is consistent with  
292 previous studies using human neuron organoids (27-29). It will be interesting to know whether  
293 this neuronal infection causes taste and smell loss, commonly found in patients with COVID-19,  
294 as neuronal circuits respond to gustatory and olfactory cues (30).

295

296 In summary, we characterized the K18-hACE2 model for COVID-19 in comparison to human  
297 biopsy samples. The model shows dose-dependent sensitivity to SARS-CoV-2 infection.  
298 Infection with low doses recapitulates the disease observed in non-severe COVID-19 patients,  
299 while infection with higher doses recapitulates the disease observed in patients with severe  
300 COVID-19. The K18-hACE2 humanized COVID-19 mouse model is excellent to study COVID-  
301 19 and develop preventive and therapeutic drugs, as well as vaccines, for coronavirus diseases.

302

303

## 304 **Materials and Methods:**

305

### 306 **Ethics statement**

307 Mouse-model studies were performed in an animal biosafety level 3 (ABSL3) facility. The  
308 animal protocol of these studies was reviewed and approved by the institutional animal care and  
309 use committee of Northern Arizona University (protocol #20-005).

310

### 311 **Viruses, cells and mice**

312 The SARS-COV-2 strain used in the mouse model was SARS-CoV-2/human/USA/WA-CDC-  
313 WA1/2020, which was purchased from EBI. The viruses were amplified using Vero-E6 cells  
314 (ATCC). Vero-E6 cells were cultured in Dulbecco's modified Eagle's medium (DMEM) plus  
315 10% fetal bovine serum (FBS) at 37°C and 5% CO<sub>2</sub>. The cells were inoculated with virus at a  
316 multiplicity of infection (MOI) of 0.001 and cultured for 96 h. Then the supernatant was  
317 collected and titrated using a plaque assay.

318 The K18-hACE2 transgenic mice, which use the human keratin 18 (KRT18) promoter to direct  
319 human ACE2 expression, were purchased from the Jackson Laboratory.

320

### 321 **Mouse infection**

322 Female and Male of six-to-eight-week-old K18-hACE2 transgenic mice under the C57BL/6J  
323 background were anesthetized and intranasally (i.n.) infected with SARS-COV-2 virus at a  
324 dosage of  $2 \times 10^1$  PFU/mouse,  $2 \times 10^2$  PFU/mouse,  $2 \times 10^3$  PFU/mouse or  $2 \times 10^4$  PFU/mouse.  
325 The uninfected control mice were inoculated with phosphate-buffered saline (PBS). All the mice

326 were observed and weighed daily. Blood was collected on day 6 from high dose groups and used  
327 for serum protection experiments. The mice were euthanized at day 6 post infection and the  
328 tissues were collected for further analysis.

329

### 330 **Viral rechallenge model**

331 The mice that survived i.n. infection with  $2 \times 10^1$  PFU and  $2 \times 10^2$  PFU of virus were  
332 rechallenged two weeks after the initial infection with  $2 \times 10^4$  PFU virus i.n. when they  
333 recovered to the initial body weight after the first infection. The body weight was continuously  
334 monitored.

335

### 336 **Serum protection model**

337 The serum of the mice infected by  $2 \times 10^4$  PFU virus was collected at day 6 post infection. Half  
338 of the serum was intraperitoneally injected into the non-infected mice 2 days before the mice  
339 were i.n. infected with  $2 \times 10^4$  PFU virus. The other half of the serum was i.n. administered right  
340 before the infection.

341

### 342 **Viral titer detection**

343 The tissues were collected, weighed and immediately homogenized using an electric  
344 homogenizer (Thomas Scientific). After centrifugation at 1200g for 10 min, the supernatant was  
345 isolated and used for viral titer detection.

346

### 347 **Viral RNA copy number detection**

348 The viral RNA was isolated from the homogenized tissues using the PureLink RNA Mini kit

349 (Invitrogen). A one-step RT-PCR kit (BioRad) was used to detect the viral RNA using Applied  
350 Biosystems QuantStudio 12K Flex Real-Time PCR System with the following cycling protocol:  
351 reverse transcription at 50°C for 10 minutes; hot start at 95°C for 10 minutes; and 40 cycles of  
352 denaturation at 95°C for 10 seconds and annealing at 60°C for 30 seconds. The primer sequences  
353 were CoV2-S\_19F (5' -GCTGAACATGTCAACAACACTC- 3') and CoV2-S\_143R (5' -  
354 GCAATGATGGATTGACTAGC- 3'), which were designed to target a 125 bp region of the  
355 SARS-CoV-2 spike protein (31). The standard samples were serial 10-fold dilutions of a known  
356 copy number of the HKU1 virus. The results were normalized and expressed as genome  
357 equivalent copies per gram of tissue.

358

### 359 **Human ACE2 RNA quantification**

360 Total RNA from the indicated tissues of the K18-hACE2 mice was isolated using the  
361 PureLink RNA Mini Kit (Invitrogen) and cDNA was synthesized using SuperScript Reverse  
362 Transcriptase (Thermo Fisher). Human ACE2 expression was examined using the following  
363 primers: F: CGAAGCCGAAGACCTGTTCTA; R: GGGCAAGTGTGGACTGTTCC, under the  
364 following PCR conditions: 98 °C for 30 s, followed by 40 cycles of 98 °C for 15 s, 62 °C for 30 s  
365 and 72 °C for 60 s.

366

### 367 **Immunohistochemistry**

368 Tissues were harvested from the infected K18-hACE2 mice and immediately fixed in 10%  
369 neutral buffered formalin. Dehydration, clear and paraffinization was performed on a Tissue -  
370 Tek VIP Vacuum Infiltration Processor (SAKURA). The samples were embedded in paraffin  
371 using a Tissue-Tek TEC Tissue Embedding Station (SAKURA). Samples were then sectioned at



372 5  $\mu$ m and put on positively charged glass slides. The slides were deparaffinized, rehydrated and  
373 stained with Modified Mayer's Hematoxylin and Eosin Y Stain (America MasterTech Scientific)  
374 on a H&E Auto Stainer (Prisma Plus Auto Stainer, SAKURA) according to standard laboratory  
375 procedures.

376 Single or double IHC stains were performed on Ventana Discovery Ultra (Ventana Medical  
377 Systems, Roche Diagnostics, Indianapolis, USA) IHC Auto Stainer. Briefly, the slides were  
378 loaded on the machine, deparaffinization, rehydration, endogenous peroxidase activity inhibition  
379 and antigen retrieval were first performed. For single IHC stain, the primary antibodies were  
380 incubated with DISCOVERY anti-Rabbit HQ following by DISCOVERY anti-HQ-HRP  
381 incubation. For double IHC stain, two antigens were sequentially detected and heat inactivation  
382 was used to prevent antibody cross-reactivity between the same species. Following each primary  
383 antibody incubation, DISCOVERY anti-Rabbit HQ or NP or DISCOVERY anti-Mouse HQ or  
384 NP and DISCOVERY anti-HQ-HRP or anti-NP-AP were incubated. The stains were visualized  
385 with DISCOVERY ChromoMap DAB Kit, DISCOVERY Yellow Kit, DISCOVERY Teal Kit or  
386 DISCOVERY Purple Kit; accordingly, counterstained with hematoxylin (Ventana) and  
387 coverslipped. The following primary Antibody information were listed: SPIKE (40150-T62, Sino  
388 Biological, at 1:2000), NP (NB100-56576, NOVUS, 1/100), hACE2 (AMAB91262, SIGMA, at  
389 1:1000), CC10 (SC-365992#, Santa Cruz at 1/5000), Pro-SPC (AB37386, Millipore at 1/500),  
390 CD68 (ab125212, abcam, at 1/100) and NeuN (24307, cell signaling, at 1/100).

391

## 392 **Statistical analysis**

393 Comparison of 2 groups was done using Student's two-tailed t-test (for unpaired samples) or a  
394 paired t-test (for paired samples). Multiple groups were compared using one-way or two-way

395 ANOVA and P values were adjusted for multiple comparisons by Holm's procedure. A P value  
396 of 0.05 or less was considered statistically significant. Kaplan-Meier analysis was performed on  
397 the survival curves.

### 398 **Acknowledgement**

399 Research reported in this publication included work performed in the Pathology Core supported  
400 by the National Cancer Institute of the National Institutes of Health under grant number  
401 P30CA033572. The content is solely the responsibility of the authors and does not necessarily  
402 represent the official views of the National Institutes.

### 403 **Author contributions**

404 J. Yu, M.A. Caligiuri, P. Keim, B. Barker, H. Mead and W. Dong conceived and designed the  
405 project. P. Keim and B. Barker supervised experiments conducted in the laboratories. W. Dong,  
406 H. Mead, S. Jaramillo, D. Kollath, V. Coyne, N. Stone, A. Jones, J. Zhang and A. Li performed  
407 experiments and/or data analyses. M. Milanes-Yearsley reviewed the pathology changes. W.  
408 Dong, J. Yu, H. Mead, L-S Wang, and M.A. Caligiuri wrote, reviewed and/or revised the paper.  
409 All authors discussed the results and commented on the manuscript.

410

### 411 **Competing interest**

412 The authors declare that they have no competing interests.

413

414 **Figure legends**

415

416 Figure 1. K18-hACE2 mouse infection model with high and low dose of SARS-CoV-2. A.  
417 Experimental scheme of the K18-hACE2 mouse infection model. The mice were intranasally  
418 infected with  $2 \times 10^1$  PFU,  $2 \times 10^2$  PFU,  $2 \times 10^3$  PFU or  $2 \times 10^4$  PFU virus. Blood samples were  
419 collected at 3- and 6-days post infection. Tissue samples were collected at 6 days post infection.  
420 Mouse body weights (B) and survival (C) were monitored daily for 13 days. Each dot represents  
421 one mouse at the indicated time point.

422

423 Figure 2. Viral quantification in mice after SARS-CoV-2 infection. A. Viral RNA levels are  
424 shown for brain, trachea, lung, heart, liver, spleen, small intestine (SI), stomach, large intestine  
425 (LI), kidney and testis. B. Viral nucleocapsid protein (NP) was detected in brain and lung of the  
426 mice infected with high and low dose of SARS-CoV-2 (Scale bar,  $40\mu\text{m}$ ).

427

428 Figure 3. Viral distribution in mice after SARS-CoV-2 infection. A. Representative images show  
429 double staining of NP (purple) with lung club (Clara) cells and alveolar type 2 cells using the  
430 markers CCL10 (yellow) and SPC (yellow), macrophages using the CD68 marker (yellow) ( $20 \times$   
431 magnification), and neurons cells using the NeuN marker (yellow), in mice infected with high-  
432 dose SARS-CoV-2 ( $10 \times$  magnification, with  $40 \times$  magnification in the  $2 \times 10^4$  PFU group).  
433 Black arrows indicate double staining cells. B. Representative images show double staining of  
434 spike protein (teal) with alveolar type 2 cells using SPC (yellow) as a marker and macrophages  
435 using CD68 (yellow) as a marker in COVID-19 patient samples ( $20 \times$  magnification). Black  
436 arrows indicate double staining cells.

437

438 Figure 4. Pathological changes in multiple tissues of K18-hACE2 mice infected with the  
439 indicated dose of SARS-CoV-2 or autopsy tissue from COVID-19 patients. A. Tissue damage in  
440 brain, trachea, lung, heart, liver, spleen, small intestine, stomach, large intestine, kidney and  
441 testis of K18-ACE2 mice after SARS-CoV-2 infection (Scale bar,  $40\mu\text{m}$ ). B. Tissue damage in  
442 trachea, bowel, spleen, kidney, heart, and lung in COVID-19 patient samples (Scale bar,  $40\mu\text{m}$ ).

443

444 Figure 5. Tissue distribution of hACE2 in K18-hACE2 mice and human samples. A. Detection of

445 NP RNA in multiple tissues of K18-hACE2 mice by RT-qPCR. B. hACE2 expression in brain,  
446 trachea, lung and kidney of K18-hACE2 mice by IHC. C. Human tissue array IHC staining for  
447 hACE2 protein.

448

449 Figure 6. Protective role of serum from previously infected mice and same mice with previous  
450 infection against rechallenge in K18-hACE2 mice. A. Body weight of mice treated with serum  
451 from previously infected mice and same mice with previously low dose-infected mice after  
452 challenge with a high dose of SARS-CoV-2. B. Survival of mice treated with serum from  
453 previously low dose-infected mice and same mice with previous infection after challenge with a  
454 high dose of SARS-CoV-2. Mice with serum protection were infected with  $2 \times 10^4$  PFU SARS-  
455 CoV-2 24 h after being infused with serum from mice infected with  $2 \times 10^4$  PFU virus for 6 days.  
456 For the rechallenge, mice were infected with  $2 \times 10^1$  PFU or  $2 \times 10^2$  PFU SARS-CoV-2 for two  
457 weeks and rechallenge with  $2 \times 10^4$  PFU SARS-CoV-2.

458

## 459 **References**

- 460 1. Davison AC, Hinkley DV. 1997. Bootstrap methods and their application. Cambridge University  
461 Press, Cambridge ; New York, NY, USA.
- 462 2. Lauer SA, Grantz KH, Bi Q, Jones FK, Zheng Q, Meredith HR, Azman AS, Reich NG, Lessler J. 2020.  
463 The Incubation Period of Coronavirus Disease 2019 (COVID-19) From Publicly Reported  
464 Confirmed Cases: Estimation and Application. *Ann Intern Med* 172:577-582.
- 465 3. WHO. 2021. Report of the WHO-China Joint Mission on Coronavirus Disease 2019 (COVID-19)
- 466 4. Gibson PG, Qin L, Puah SH. 2020. COVID-19 acute respiratory distress syndrome (ARDS): clinical  
467 features and differences from typical pre-COVID-19 ARDS. *Med J Aust* 213:54-56 e1.
- 468 5. Brodin P. 2021. Immune determinants of COVID-19 disease presentation and severity. *Nat Med*  
469 27:28-33.
- 470 6. Blot M, Bour JB, Quenot JP, Bourredjem A, Nguyen M, Guy J, Monier S, Georges M, Large A,  
471 Dargent A, Guilhem A, Mouries-Martin S, Barben J, Bouhemad B, Charles PE, Chavanet P,  
472 Biquet C, Piroth L, group Ls. 2020. The dysregulated innate immune response in severe COVID-  
473 19 pneumonia that could drive poorer outcome. *J Transl Med* 18:457.
- 474 7. Mazzoni A, Salvati L, Maggi L, Capone M, Vanni A, Spinicci M, Mencarini J, Caporale R, Peruzzi B,  
475 Antonelli A, Trotta M, Zammarchi L, Ciani L, Gori L, Lazzeri C, Matucci A, Vultaggio A, Rossi O,  
476 Almerigogna F, Parronchi P, Fontanari P, Lavorini F, Peris A, Rossolini GM, Bartoloni A,  
477 Romagnani S, Liotta F, Annunziato F, Cosmi L. 2020. Impaired immune cell cytotoxicity in severe  
478 COVID-19 is IL-6 dependent. *J Clin Invest* 130:4694-4703.
- 479 8. Walls AC, Park YJ, Tortorici MA, Wall A, McGuire AT, Veesler D. 2020. Structure, Function, and  
480 Antigenicity of the SARS-CoV-2 Spike Glycoprotein. *Cell* 181:281-292 e6.
- 481 9. McCray PB, Jr., Pewe L, Wohlford-Lenane C, Hickey M, Manzel L, Shi L, Netland J, Jia HP, Halabi  
482 C, Sigmund CD, Meyerholz DK, Kirby P, Look DC, Perlman S. 2007. Lethal infection of K18-hACE2  
483 mice infected with severe acute respiratory syndrome coronavirus. *J Virol* 81:813-21.
- 484 10. Jiang RD, Liu MQ, Chen Y, Shan C, Zhou YW, Shen XR, Li Q, Zhang L, Zhu Y, Si HR, Wang Q, Min J,  
485 Wang X, Zhang W, Li B, Zhang HJ, Baric RS, Zhou P, Yang XL, Shi ZL. 2020. Pathogenesis of SARS-  
486 CoV-2 in Transgenic Mice Expressing Human Angiotensin-Converting Enzyme 2. *Cell* 182:50-58  
487 e8.
- 488 11. Bao L, Deng W, Huang B, Gao H, Liu J, Ren L, Wei Q, Yu P, Xu Y, Qi F, Qu Y, Li F, Lv Q, Wang W,  
489 Xue J, Gong S, Liu M, Wang G, Wang S, Song Z, Zhao L, Liu P, Zhao L, Ye F, Wang H, Zhou W, Zhu  
490 N, Zhen W, Yu H, Zhang X, Guo L, Chen L, Wang C, Wang Y, Wang X, Xiao Y, Sun Q, Liu H, Zhu F,  
491 Ma C, Yan L, Yang M, Han J, Xu W, Tan W, Peng X, Jin Q, Wu G, Qin C. 2020. The pathogenicity of  
492 SARS-CoV-2 in hACE2 transgenic mice. *Nature* 583:830-833.
- 493 12. Sun SH, Chen Q, Gu HJ, Yang G, Wang YX, Huang XY, Liu SS, Zhang NN, Li XF, Xiong R, Guo Y,  
494 Deng YQ, Huang WJ, Liu Q, Liu QM, Shen YL, Zhou Y, Yang X, Zhao TY, Fan CF, Zhou YS, Qin CF,  
495 Wang YC. 2020. A Mouse Model of SARS-CoV-2 Infection and Pathogenesis. *Cell Host Microbe*  
496 28:124-133 e4.
- 497 13. Hassan AO, Case JB, Winkler ES, Thackray LB, Kafai NM, Bailey AL, McCune BT, Fox JM, Chen RE,  
498 Alsoussi WB, Turner JS, Schmitz AJ, Lei T, Shrihari S, Keeler SP, Fremont DH, Greco S, McCray PB,  
499 Jr., Perlman S, Holtzman MJ, Ellebedy AH, Diamond MS. 2020. A SARS-CoV-2 Infection Model in  
500 Mice Demonstrates Protection by Neutralizing Antibodies. *Cell* doi:10.1016/j.cell.2020.06.011.
- 501 14. Grant RA, Morales-Nebreda L, Markov NS, Swaminathan S, Querrey M, Guzman ER, Abbott DA,  
502 Donnelly HK, Donayre A, Goldberg IA, Klug ZM, Borkowski N, Lu Z, Kihshen H, Politanska Y,  
503 Sichizya L, Kang M, Shilatfard A, Qi C, Lomasney JW, Argento AC, Kruser JM, Malsin ES, Pickens  
504 CO, Smith SB, Walter JM, Pawlowski AE, Schneider D, Nannapaneni P, Abdala-Valencia H, Bharat  
505 A, Gottardi CJ, Budinger GRS, Misharin AV, Singer BD, Wunderink RG, Investigators NSS. 2021.

- 506 Circuits between infected macrophages and T cells in SARS-CoV-2 pneumonia. *Nature* 590:635-  
507 641.
- 508 15. Chow YH, O'Brodovich H, Plumb J, Wen Y, Sohn KJ, Lu Z, Zhang F, Lukacs GL, Tanswell AK, Hui CC,  
509 Buchwald M, Hu J. 1997. Development of an epithelium-specific expression cassette with human  
510 DNA regulatory elements for transgene expression in lung airways. *Proc Natl Acad Sci U S A*  
511 94:14695-700.
- 512 16. Yang XH, Deng W, Tong Z, Liu YX, Zhang LF, Zhu H, Gao H, Huang L, Liu YL, Ma CM, Xu YF, Ding  
513 MX, Deng HK, Qin C. 2007. Mice transgenic for human angiotensin-converting enzyme 2 provide  
514 a model for SARS coronavirus infection. *Comp Med* 57:450-9.
- 515 17. Ostrowski LE, Hutchins JR, Zakel K, O'Neal WK. 2003. Targeting expression of a transgene to the  
516 airway surface epithelium using a ciliated cell-specific promoter. *Mol Ther* 8:637-45.
- 517 18. Arce VM, Costoya JA. 2021. SARS-CoV-2 infection in K18-ACE2 transgenic mice replicates human  
518 pulmonary disease in COVID-19. *Cell Mol Immunol* 18:513-514.
- 519 19. Moreau GB, Burgess SL, Sturek JM, Donlan AN, Petri WA, Mann BJ. 2020. Evaluation of K18-  
520 hACE2 Mice as a Model of SARS-CoV-2 Infection. *Am J Trop Med Hyg* 103:1215-1219.
- 521 20. Oladunni FS, Park JG, Pino PA, Gonzalez O, Akhter A, Allue-Guardia A, Olmo-Fontanez A, Gautam  
522 S, Garcia-Vilanova A, Ye C, Chiem K, Headley C, Dwivedi V, Parodi LM, Alfson KJ, Staples HM,  
523 Schami A, Garcia JI, Whigham A, Platt RN, 2nd, Gazi M, Martinez J, Chuba C, Earley S, Rodriguez  
524 OH, Mdaki SD, Kavelish KN, Escalona R, Hallam CRA, Christie C, Patterson JL, Anderson TJC,  
525 Carrion R, Jr., Dick EJ, Jr., Hall-Ursone S, Schlesinger LS, Alvarez X, Kaushal D, Giavedoni LD,  
526 Turner J, Martinez-Sobrido L, Torrelles JB. 2020. Lethality of SARS-CoV-2 infection in K18 human  
527 angiotensin-converting enzyme 2 transgenic mice. *Nat Commun* 11:6122.
- 528 21. Winkler ES, Bailey AL, Kafai NM, Nair S, McCune BT, Yu J, Fox JM, Chen RE, Earnest JT, Keeler SP,  
529 Ritter JH, Kang LI, Dort S, Robichaud A, Head R, Holtzman MJ, Diamond MS. 2020. SARS-CoV-2  
530 infection of human ACE2-transgenic mice causes severe lung inflammation and impaired  
531 function. *Nat Immunol* 21:1327-1335.
- 532 22. Yinda CK, Port JR, Bushmaker T, Owusu IO, Avanzato VA, Fischer RJ, Schulz JE, Holbrook MG,  
533 Hebner MJ, Rosenke R, Thomas T, Marzi A, Best SM, de Wit E, Shaia C, van Doremalen N,  
534 Munster VJ. 2020. K18-hACE2 mice develop respiratory disease resembling severe COVID-19.  
535 bioRxiv doi:10.1101/2020.08.11.246314.
- 536 23. Sia SF, Yan LM, Chin AWH, Fung K, Choy KT, Wong AYL, Kaewpreedee P, Perera R, Poon LLM,  
537 Nicholls JM, Peiris M, Yen HL. 2020. Pathogenesis and transmission of SARS-CoV-2 in golden  
538 hamsters. *Nature* 583:834-838.
- 539 24. Sepehrinezhad A, Shahbazi A, Negah SS. 2020. COVID-19 virus may have neuroinvasive potential  
540 and cause neurological complications: a perspective review. *J Neurovirol* 26:324-329.
- 541 25. Muhammad S, Petridis A, Cornelius JF, Hanggi D. 2020. Letter to editor: Severe brain  
542 haemorrhage and concomitant COVID-19 Infection: A neurovascular complication of COVID-19.  
543 *Brain Behav Immun* 87:150-151.
- 544 26. Mao XY, Jin WL. 2020. The COVID-19 Pandemic: Consideration for Brain Infection. *Neuroscience*  
545 437:130-131.
- 546 27. Ramani A, Pranty AI, Gopalakrishnan J. 2021. Neurotropic effects of SARS-CoV-2 modeled by the  
547 human brain organoids. *Stem Cell Reports* doi:10.1016/j.stemcr.2021.02.007.
- 548 28. Pellegrini L, Albecka A, Mallery DL, Kellner MJ, Paul D, Carter AP, James LC, Lancaster MA. 2020.  
549 SARS-CoV-2 Infects the Brain Choroid Plexus and Disrupts the Blood-CSF Barrier in Human Brain  
550 Organoids. *Cell Stem Cell* 27:951-961 e5.
- 551 29. Zhang BZ, Chu H, Han S, Shuai H, Deng J, Hu YF, Gong HR, Lee AC, Zou Z, Yau T, Wu W, Hung IF,  
552 Chan JF, Yuen KY, Huang JD. 2020. SARS-CoV-2 infects human neural progenitor cells and brain  
553 organoids. *Cell Res* 30:928-931.

- 554 30. Cooper KW, Brann DH, Farruggia MC, Bhutani S, Pellegrino R, Tsukahara T, Weinreb C, Joseph  
555 PV, Larson ED, Parma V, Albers MW, Barlow LA, Datta SR, Di Pizio A. 2020. COVID-19 and the  
556 Chemical Senses: Supporting Players Take Center Stage. *Neuron* 107:219-233.
- 557 31. Stone NE, Jaramillo SA, Jones AN, Vazquez AJ, Martz M, Versluis LM, Raniere MO, Nunnally HE,  
558 Zarn KE, Nottingham R, Ng KR, Sahl JW, Wagner DM, Knudsen S, Settles EW, Keim P, French CT.  
559 2021. Stenoparib, an Inhibitor of Cellular Poly(ADP-Ribose) Polymerase, Blocks Replication of the  
560 SARS-CoV-2 and HCoV-NL63 Human Coronaviruses In Vitro. *mBio* 12.
- 561

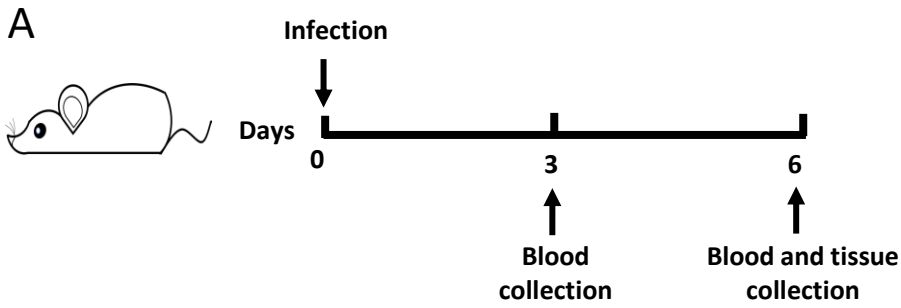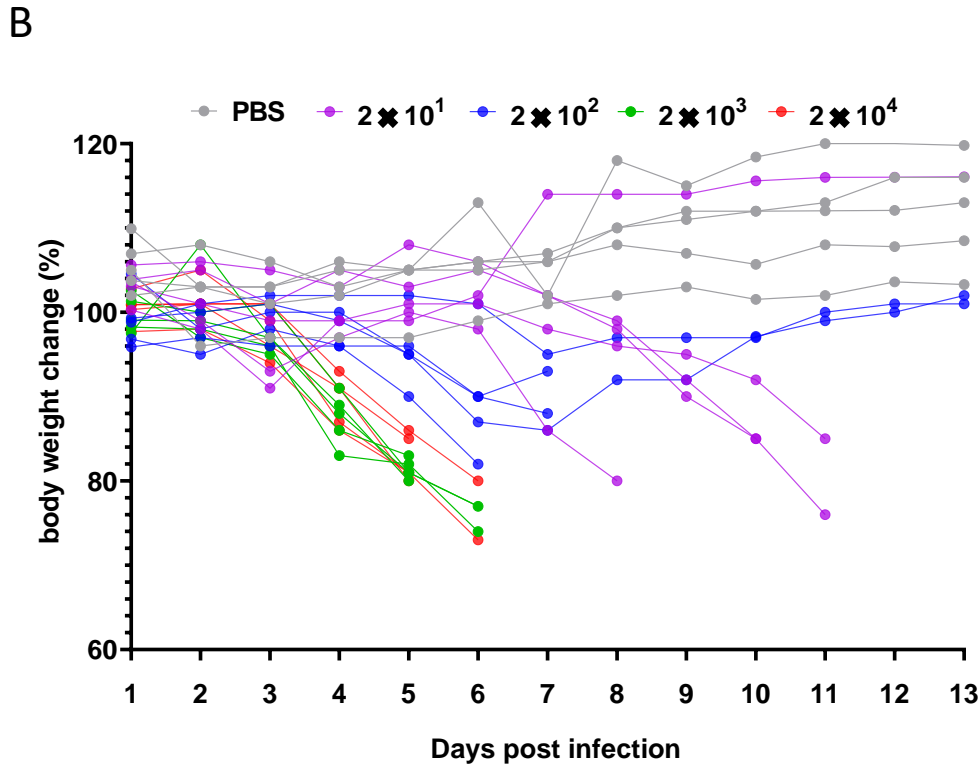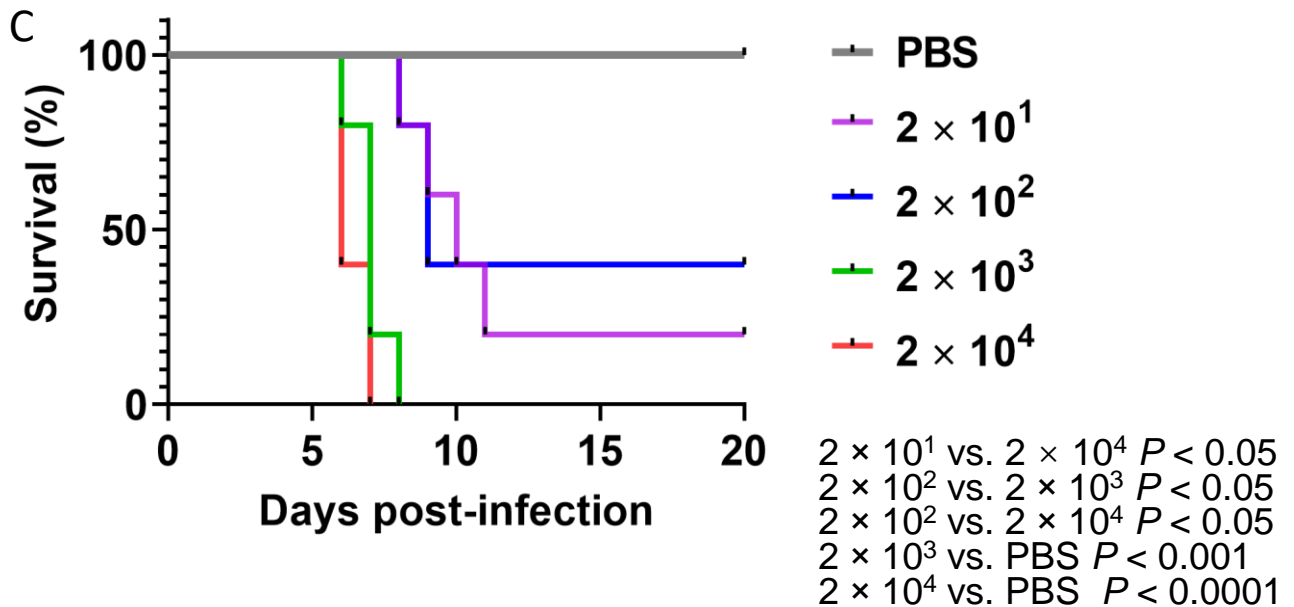

**Figure 1**



A

|                                        | Brain    | Trachea | Lung    | Heart   | Liver   | Spleen  | SI      | Stomach | LI      | Kidney  | Testis |
|----------------------------------------|----------|---------|---------|---------|---------|---------|---------|---------|---------|---------|--------|
| $2 \times 10^1$ V.S<br>$2 \times 10^2$ | P=0.003  | P=0.004 | P=0.002 | P<0.001 | P=0.002 | P<0.001 | P<0.001 | P=0.07  | P=0.045 | P=0.057 | P=0.18 |
| $2 \times 10^2$ V.S<br>$2 \times 10^3$ | P<0.0002 | P=0.09  | P=0.44  | P=0.69  | P=0.28  | P=0.102 | P=0.68  | P=0.16  | P=0.045 | P=0.26  | P=0.18 |
| $2 \times 10^3$ V.S<br>$2 \times 10^4$ | P=0.0054 | P=0.284 | P=0.19  | P=0.70  | P=0.95  | P=1.0   | P=0.68  | P=0.38  | P=0.81  | P=0.75  | P=0.77 |

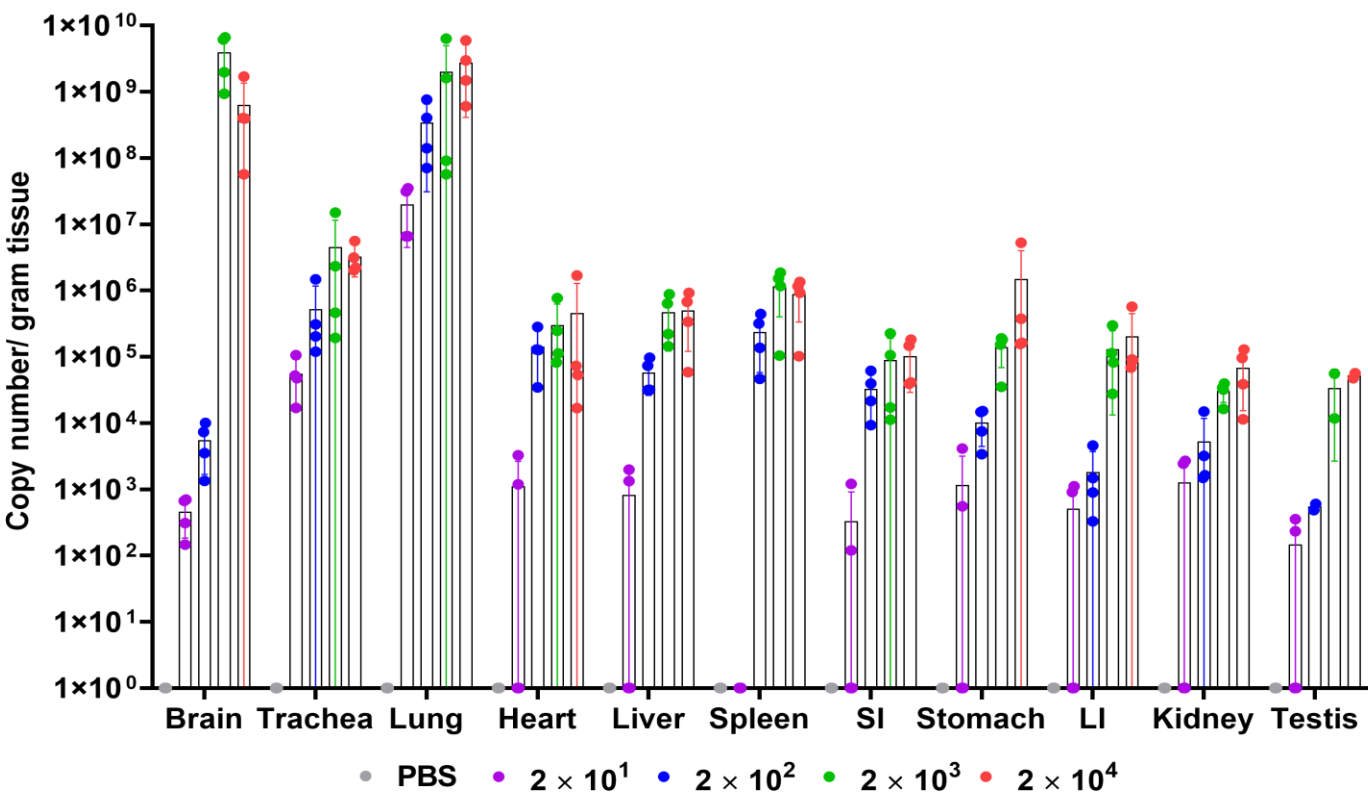

B

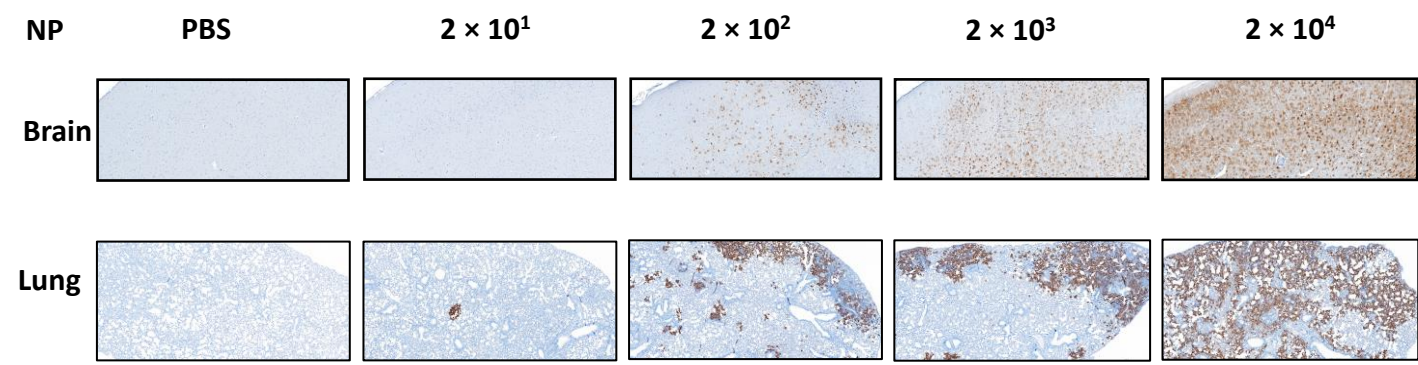

Figure 2

**A**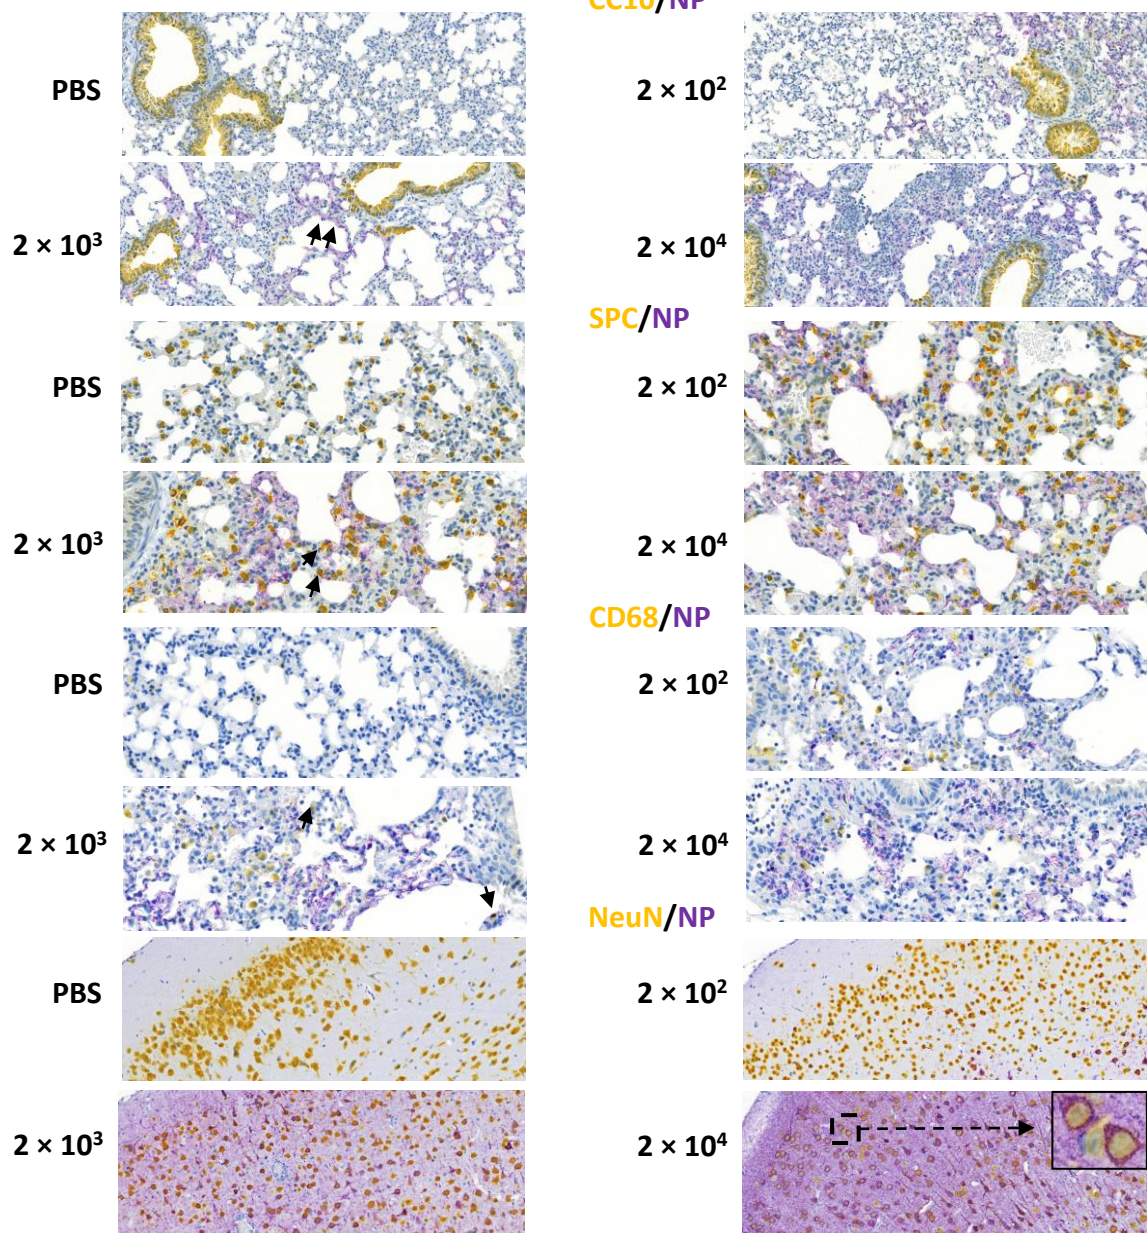**B**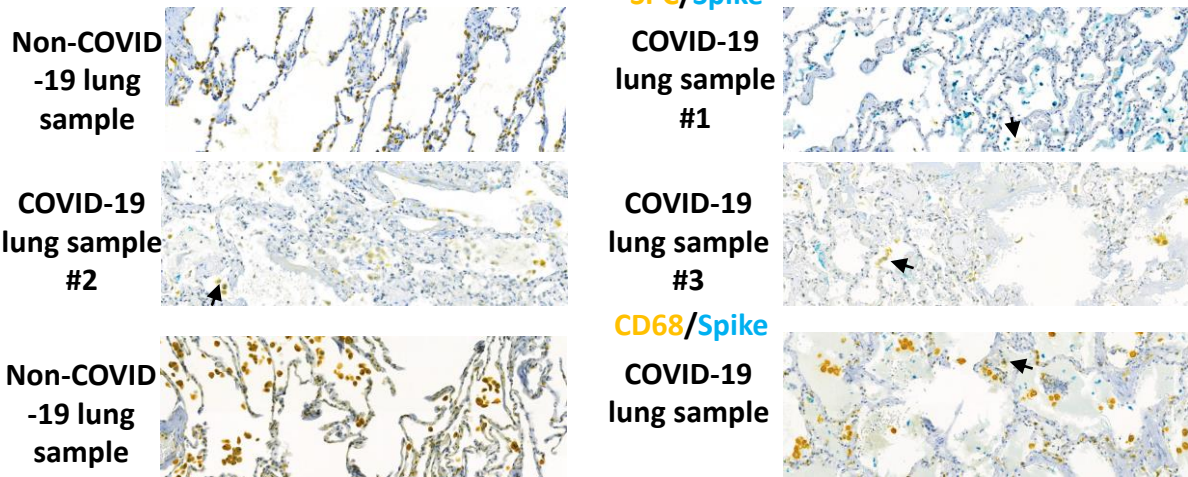**Figure 3**



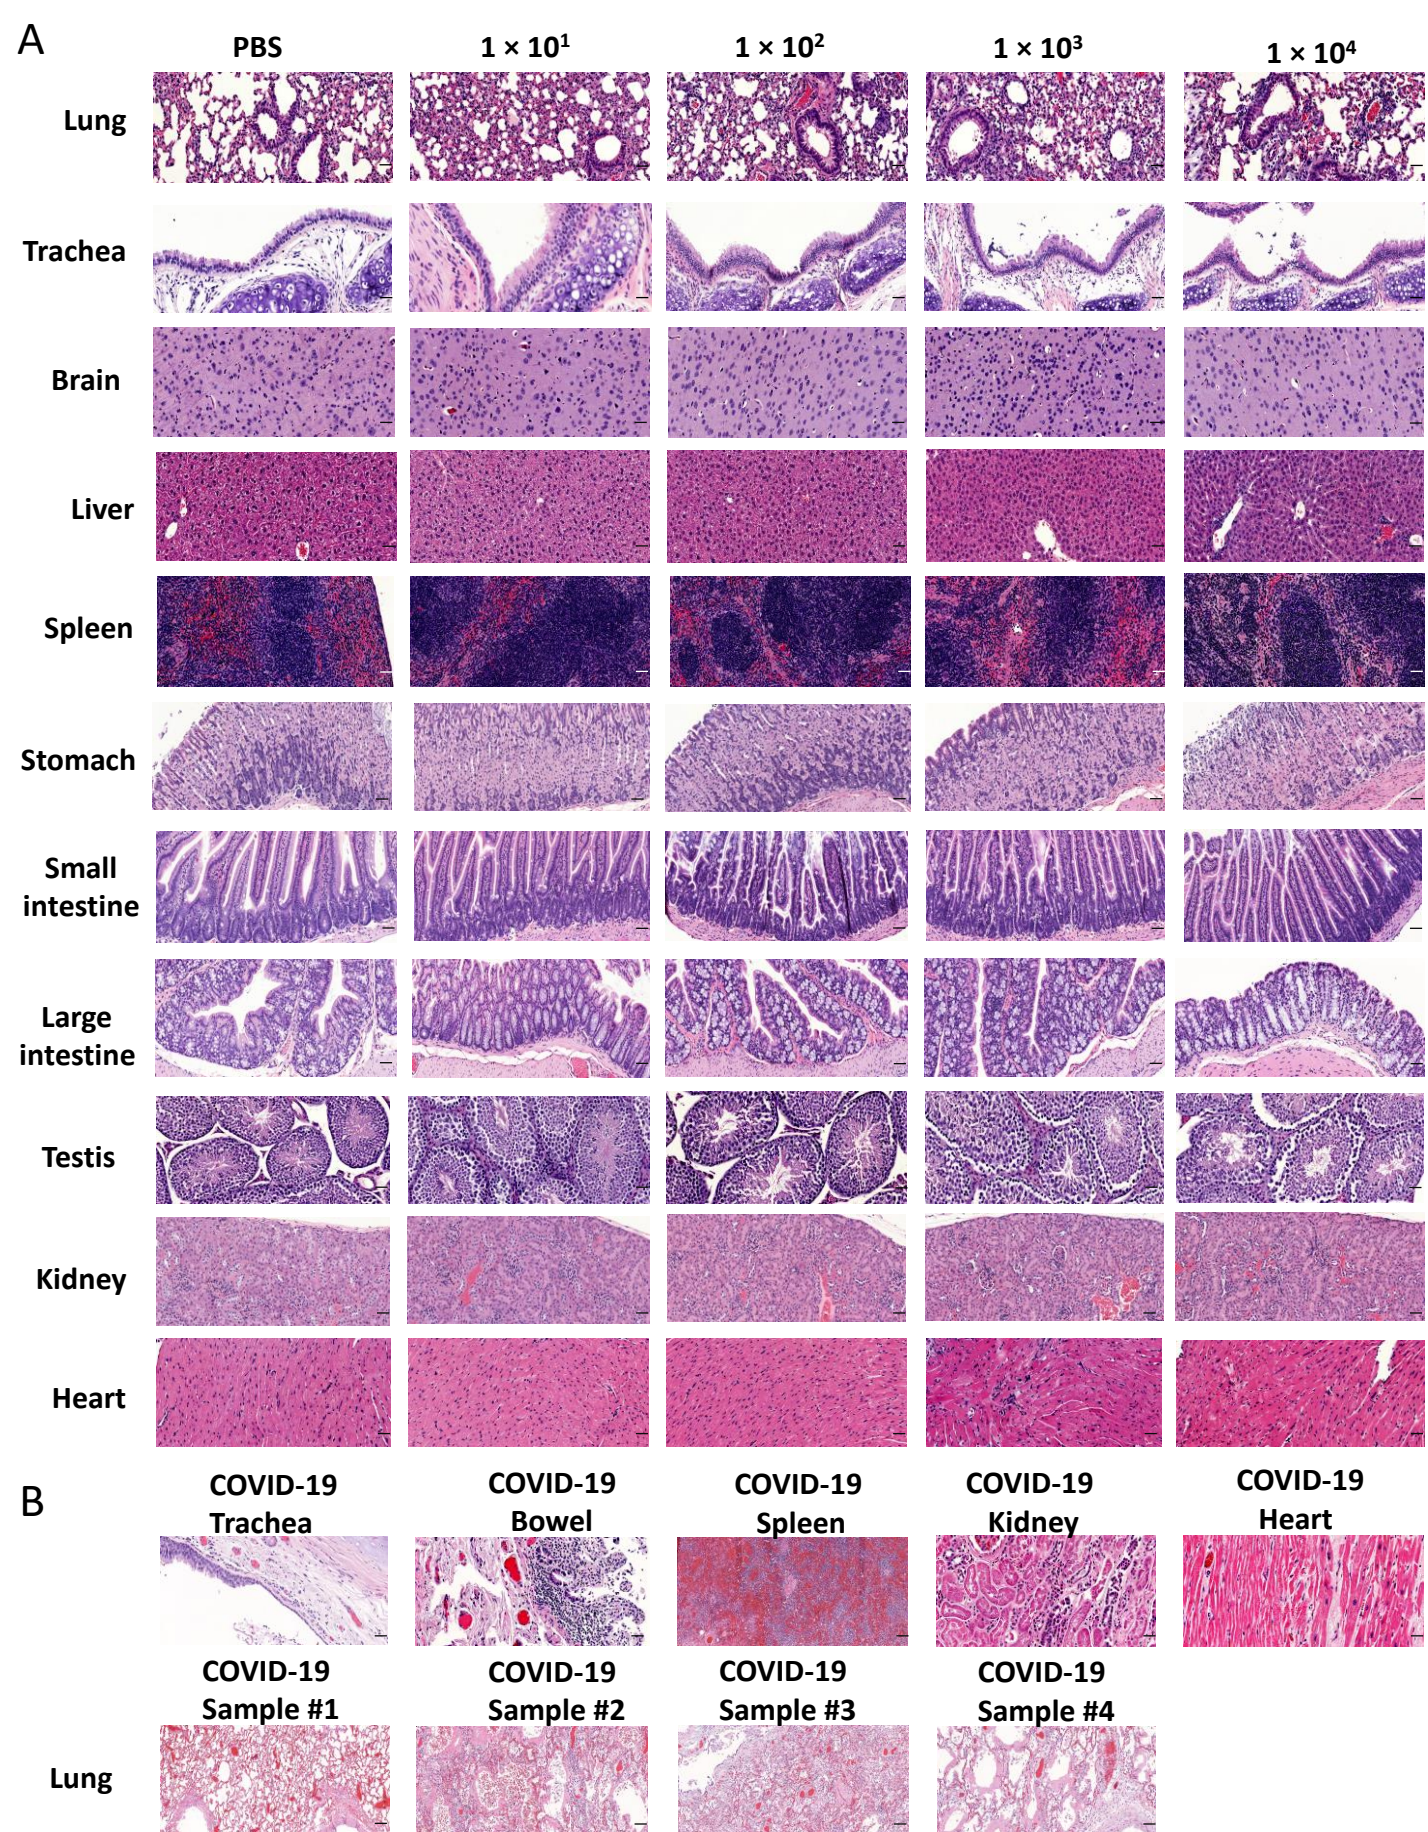

**Figure 4**



**A**

Brain V.S Lung p=0.31  
 Trachea V.S Lung p=0.09  
 Heart V.S Lung p=0.859  
 Liver V.S Lung p<0.001  
 Spleen V.S Lung p<0.05

Stomach V.S Lung p=0.16  
 SI V.S Lung p=0.12  
 LI V.S Lung p=0.063  
 Kidney V.S Lung p=0.060  
 Testis V.S Lung p=0.060

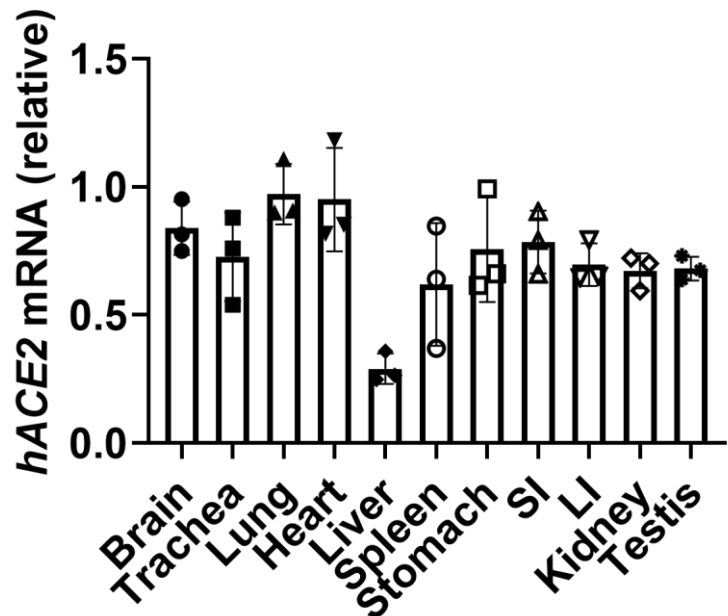**B**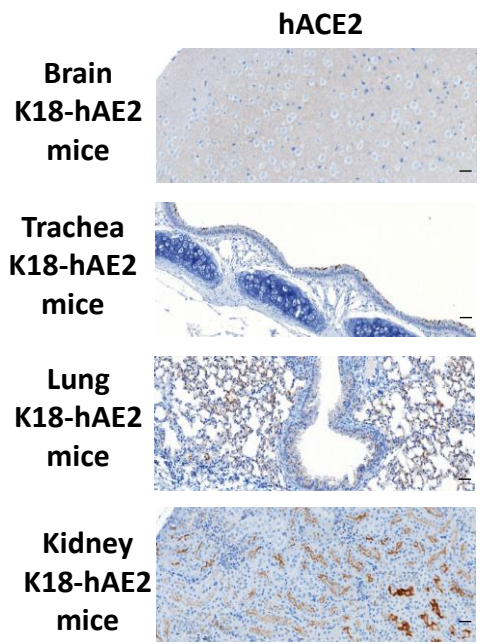**C**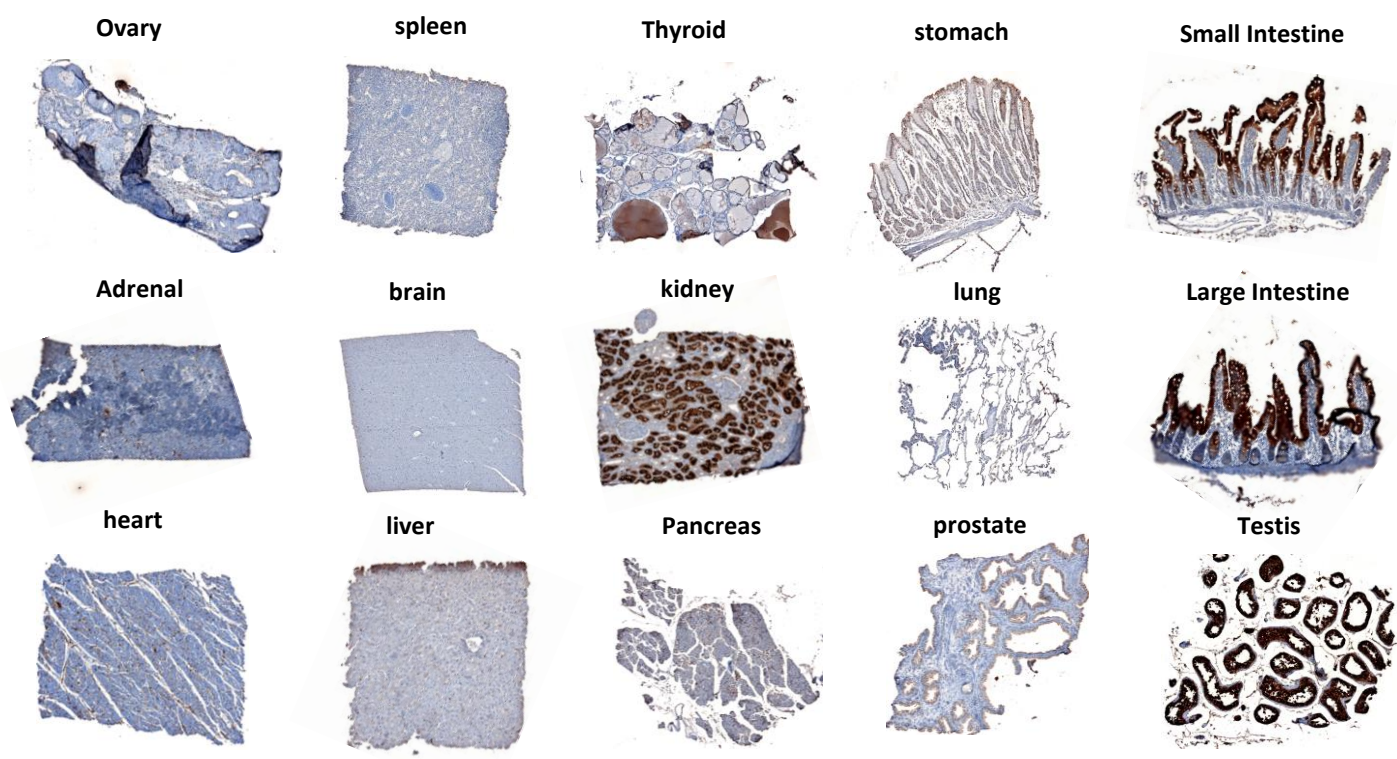**Figure 5**

A

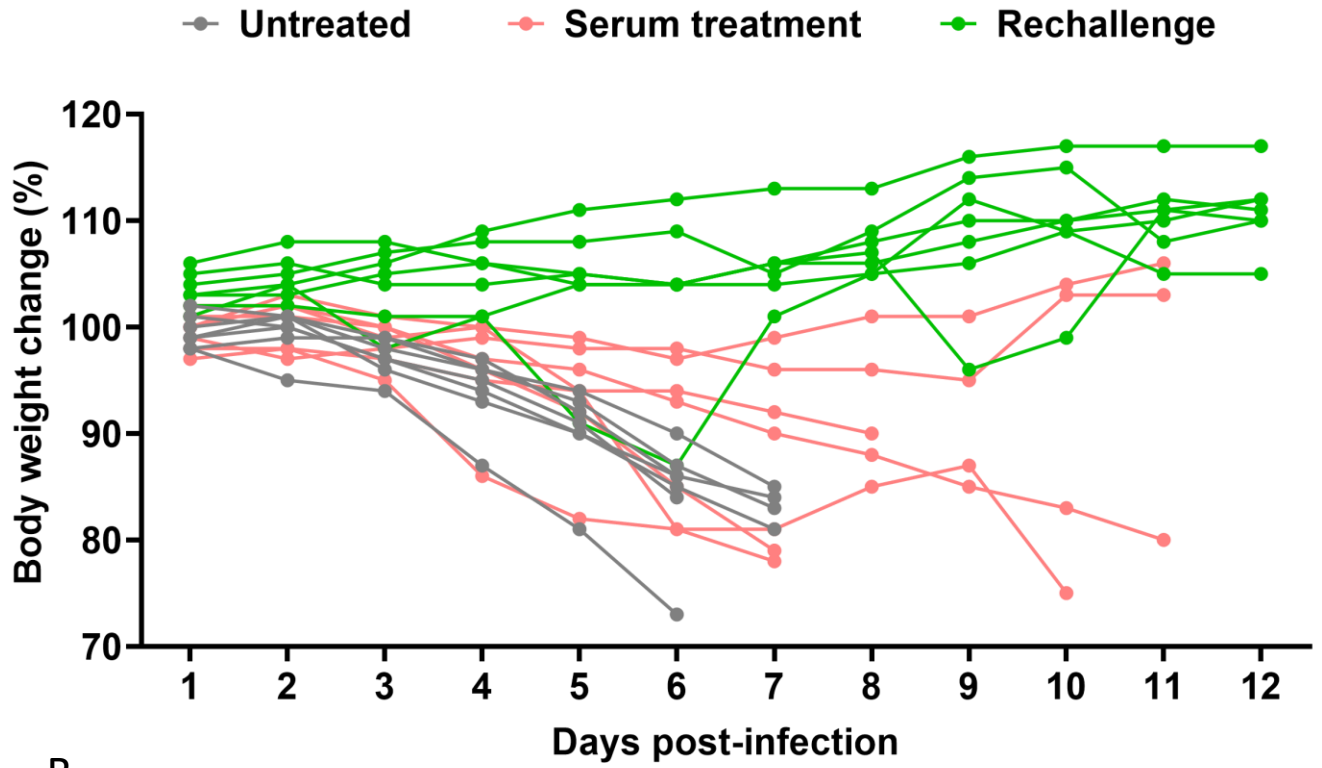

B

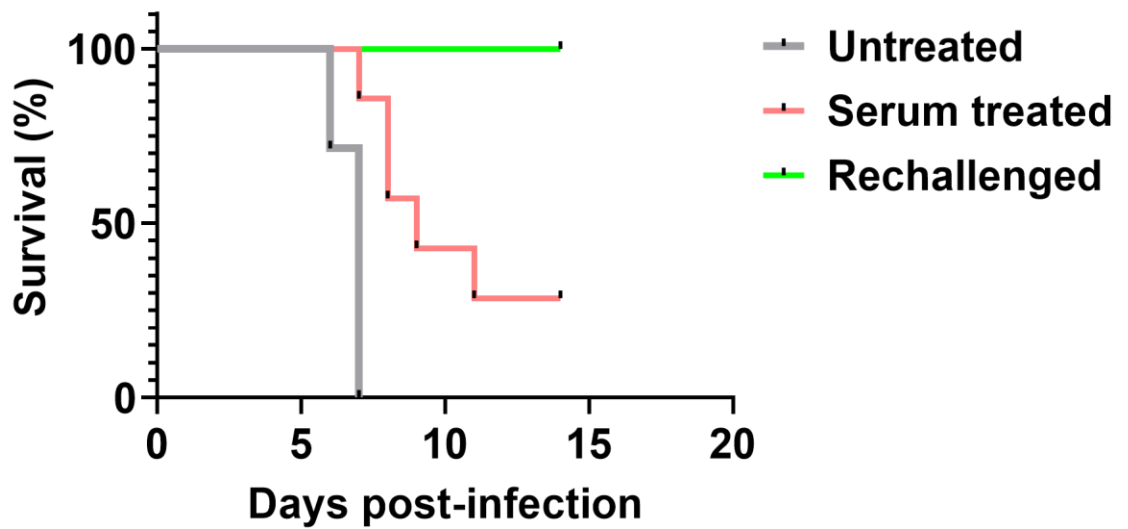

Figure 6
